# Supplementary material for: Assessment of Pharmaco-Technological Parameters of Solid Lipid Nanoparticles as Carriers for Sinapic Acid
Source: MDPI journal article supplement (doi:10.3390/micro3020034), 2023-05-05
Supplement: s1 [file s1]

Archive with 1 entries (1 files):
- micro-2331177-supplementary.pdf
