# Supplementary material for: Assessment of Pharmaco-Technological Parameters of Solid Lipid Nanoparticles as Carriers for Sinapic Acid
Source: MDPI journal article supplement (doi:10.3390/micro3020034), 2023-05-05
Supplement: s1 [file s1 › micro-2331177-supplementary.pdf]

Supplementary Material

# Assessment of Pharmaco-Technological Parameters of Solid Lipid Nanoparticles as Carriers for Sinapic Acid

Stefano Russo, Giuliana Greco and Maria Grazia Sarpietro \*

Department of Drug and Health Sciences, University of Catania, Viale Andrea Doria 6, 95125 Catania, Italy

\* Correspondence: mg.sarpietro@unict.it

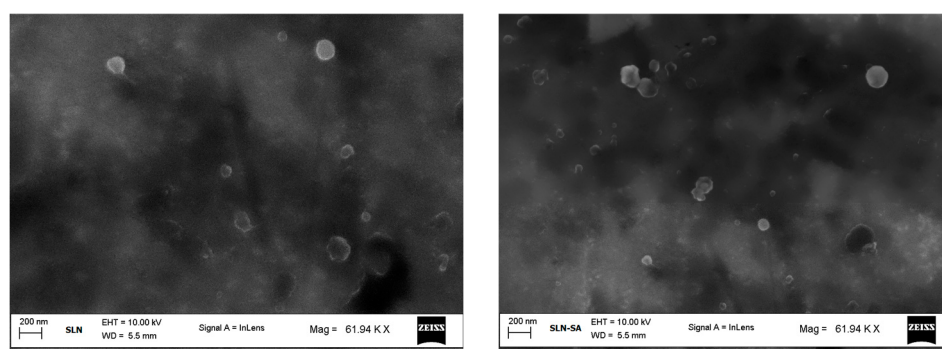

**Figure S1.** SEM images of SLN and SLN-SA.

**Citation:** Russo, S.; Greco, G.; Sarpietro, M.G. Assessment of Pharmaco-Technological Parameters of Solid Lipid Nanoparticles as Carriers for Sinapic Acid. *Micro* **2023**, *3*, 510–520. <https://doi.org/10.3390/micro3020034>

Academic Editor: Horacio Bach

Received: 23 March 2023

Revised: 27 April 2023

Accepted: 2 May 2023

Published: 5 May 2023

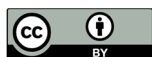

**Copyright:** © 2023 by the authors. Licensee MDPI, Basel, Switzerland. This article is an open access article distributed under the terms and conditions of the Creative Commons Attribution (CC BY) license (<https://creativecommons.org/licenses/by/4.0/>).
